# Supplementary material
Source: PubMed Central journal article supplement (PMC2781618)
Supplement: supp_M109.044099_jbc.M109.044099-1.pdf [file supp_M109.044099_jbc.M109.044099-1.pdf]

**Supplemental table 1. Sequences of PCR primers used for generation of mutated mMbSerRS genes.** Changes introduced with primers are shown in bold.

| Mutant | Location in N-terminal domain of mMbSerRS | Primer sequence                                                                                                       |
|--------|-------------------------------------------|-----------------------------------------------------------------------------------------------------------------------|
| R38A   | between helix H1 and $\beta$ -sheet A2    | 5'-GCCCTTCAGGCGCCCT <b>G</b> CGGTGAGAAGGGTACTGTTTGC<br>5'-GCAAACAGTACCCTTCTCACCGCAGGGGGCGCCTGAAGGGC                   |
| R76A   | helix H2                                  | 5'-GCCGAGTGCCTCAGCAAGCTGTTTTCTAAGCG <b>C</b> GAAAAATTGC<br>5'-GCAATTTT <b>C</b> CGCTTAGAAAACAGCTTGCTGAGGCACTCGGC      |
| R78A   | helix H2                                  | 5'-GCCTCAGCAAGCTGTTTT <b>G</b> CAAGCCGAAAAATTGCATCGTGC<br>5'-GCACGATGCAATTTTCCGGCTT <b>G</b> C AAAACAGCTTGCTGAGGC     |
| K79A   | helix H2                                  | 5'-GCCGAGTGCCTCAGCAAGCTGT <b>G</b> CTCTAAGCCGAAAAATTGC<br>5'-GCAATTTTCCGGCTTAGAG <b>C</b> ACAGCTTGCTGAGGCACTCGGC      |
| K87A   | between helix H2 and $\beta$ -sheet A4    | 5'-CCGATCTTGTATTT <b>C</b> CGCCGAGTGCCTCAGCAAGCTG<br>5'-CAGCTTGCTGAGGCACTCGGC <b>G</b> CGAAATACAAGATCGG               |
| K88A   | between helix H2 and $\beta$ -sheet A4    | 5'-GAATACCGATCTTGTAT <b>G</b> CCTTGCCGAGTGCCTCAG<br>5'-CTGAGGCACTCGGCAAG <b>G</b> CATACAAGATCGGTATTC                  |
| Y89A   | between helix H2 and $\beta$ -sheet A4    | 5'-CCGGAATACCGATCTT <b>G</b> GCTTCTTGCCGAGTGCCTCAGC<br>5'-GCTGAGGCACTCGGCAAGAA <b>G</b> CCAAGATCGGTATTCGCGG           |
| K90A   | between helix H2 and $\beta$ -sheet A4    | 5'-CCGGAATACCGAT <b>C</b> GCGTATTTCTTGCCGAGTGCCTCAGC<br>5'-GCTGAGGCACTCGGCAAGAA <b>T</b> AC <b>G</b> CGATCGGTATTCGCGG |
| R94A   | between helix H2 and $\beta$ -sheet A4    | 5'-GAAATACAAGATCGGTATT <b>G</b> CCGGAATCGAGGTTGAGTC<br>5'-GACTCAACCTCGATTCC <b>G</b> GCAATACCGATCTTGTATTT             |
| K141A  | helix H3                                  | 5'-CCTGTCCGGAACCCGGTTC <b>G</b> CCATCTCAGCTTCTCCGACC<br>5'-GGTCGGAGAAGCTGAGAT <b>G</b> GCGAACCCGGTTCGGACAGG           |
| N142A  | helix H3                                  | 5'-CCTGTCCGGAACCCGG <b>C</b> CTTCATCTCAGCTTCTCCGACC<br>5'-GGTCGGAGAAGCTGAGATGAAG <b>G</b> CCCGGGTTCGGACAGG            |
| R143A  | between helices H3 and H4                 | 5'-GAGAATCCTGTCCGGAAC <b>C</b> GCTTCTTCATCTCAGCTTC<br>5'-GAAGCTGAGATGAAGA <b>A</b> C <b>G</b> CGGTTCGGACAGGATTCTC     |
